# Supplementary material for: Modular synthesis of glycopolymers with well-defined sugar units in the side chain via Ugi reaction and click chemistry: hetero vs. homo
Source: Royal Society of Chemistry journal article supplement (doi:10.1039/c6py00734a), 2016-01-01
Supplement: c6py00734a1.pdf [file c6py00734a1.pdf]

## Modular Synthesis of Glycopolymers with Well-Defined Sugar Units in The Side Chain *via* Ugi Reaction and Click Chemistry: hetero vs homo

Lulu Xue, Xinhong Xiong, Kui Chen, Yafei Luan, Gaojian Chen\*, Hong Chen\*

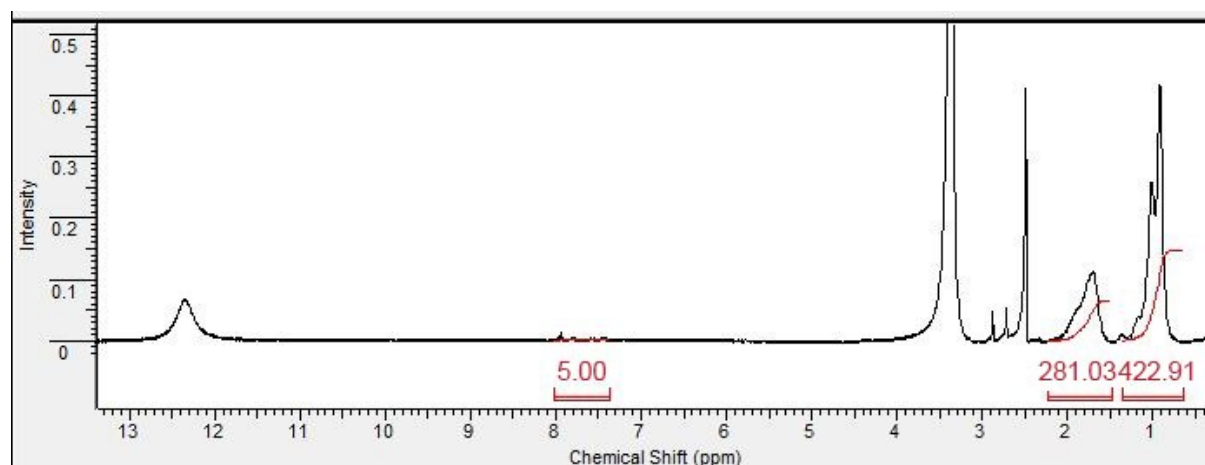

Figure S1. <sup>1</sup>H NMR spectrum of PMAA in D<sub>2</sub>O.

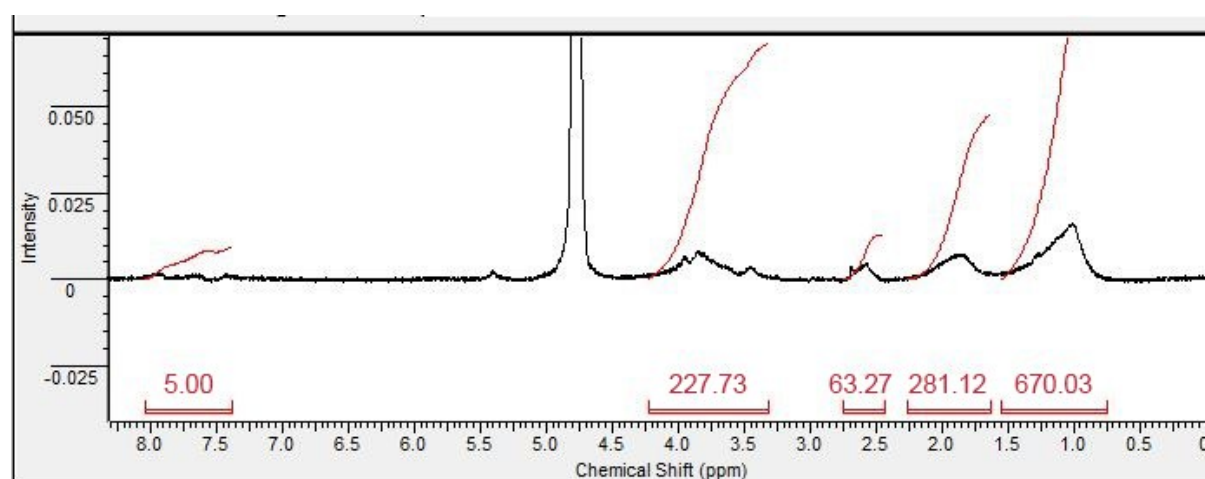

Figure S2. <sup>1</sup>H NMR spectrum of PM-G in D<sub>2</sub>O.

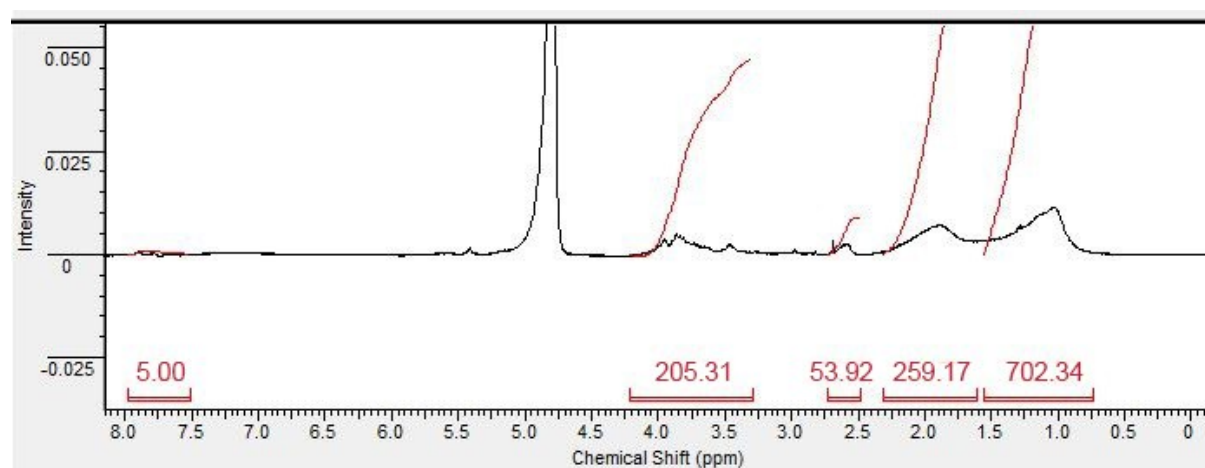

Figure S3.  $^1\text{H}$  NMR spectrum of PM-M in  $\text{D}_2\text{O}$ .

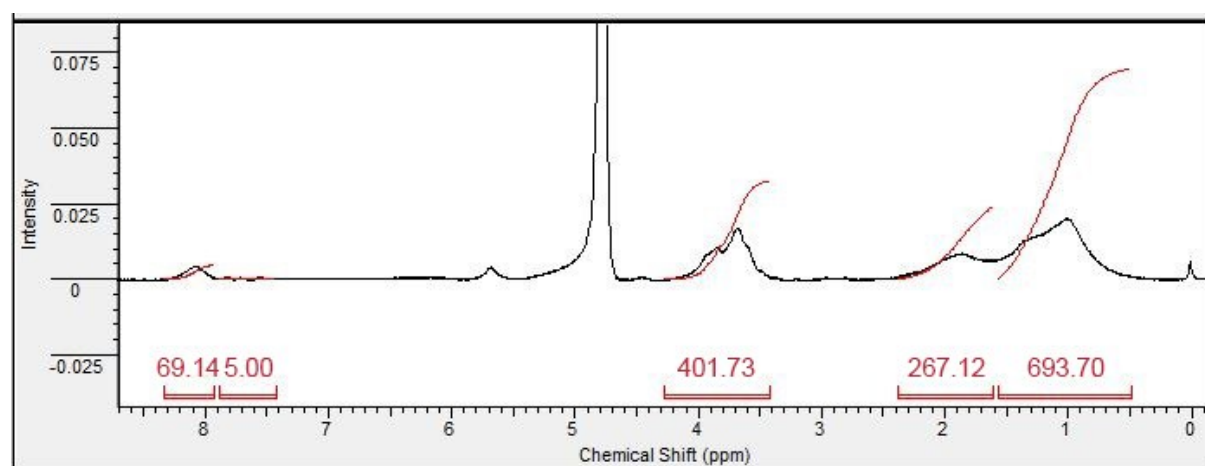

Figure S4.  $^1\text{H}$  NMR spectrum of PM-GG in  $\text{D}_2\text{O}$ .

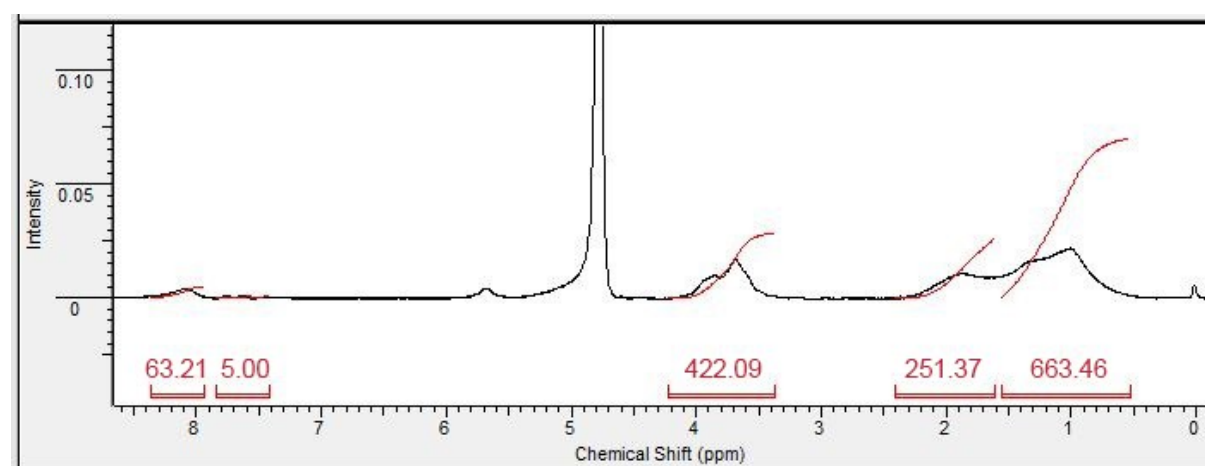

Figure S5.  $^1\text{H}$  NMR spectrum of PM-GM in  $\text{D}_2\text{O}$ .

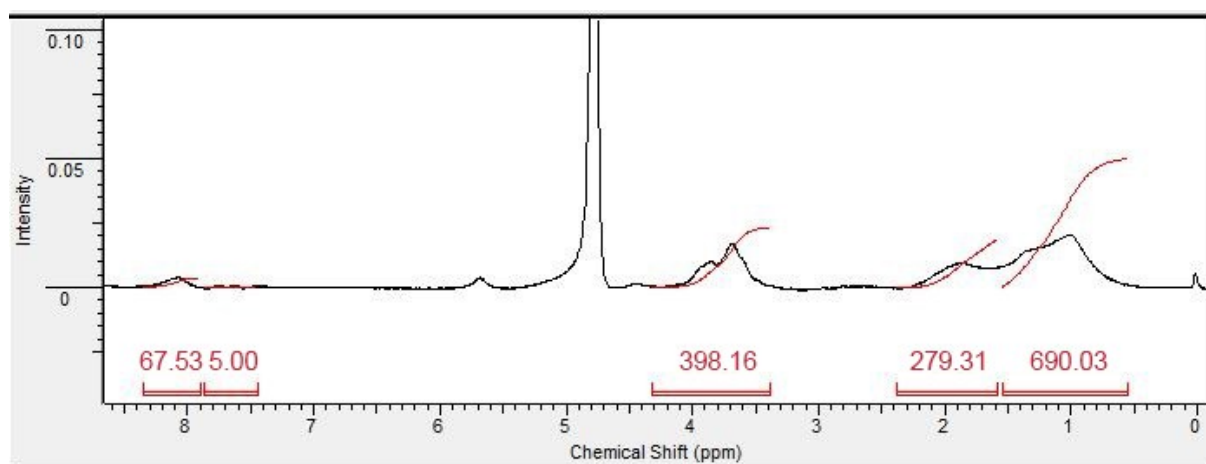

Figure S6.  $^1\text{H}$  NMR spectrum of PM-MM in  $\text{D}_2\text{O}$ .

Table S1. The GPC result of polymers used in the experiments.

| Samples | $M_n$ , by NMR | $M_n$ , by GPC | PDI  |
|---------|----------------|----------------|------|
| PMAA    | 11700          | 10800          | 1.12 |
| PM-G    | 36200          | 11900          | 1.21 |
| PM-M    | 35700          | 12100          | 1.22 |
| PM-GG   | 43100          | 12800          | 1.28 |
| PM-GM   | 42500          | 13100          | 1.30 |
| PM-MM   | 44000          | 13000          | 1.29 |

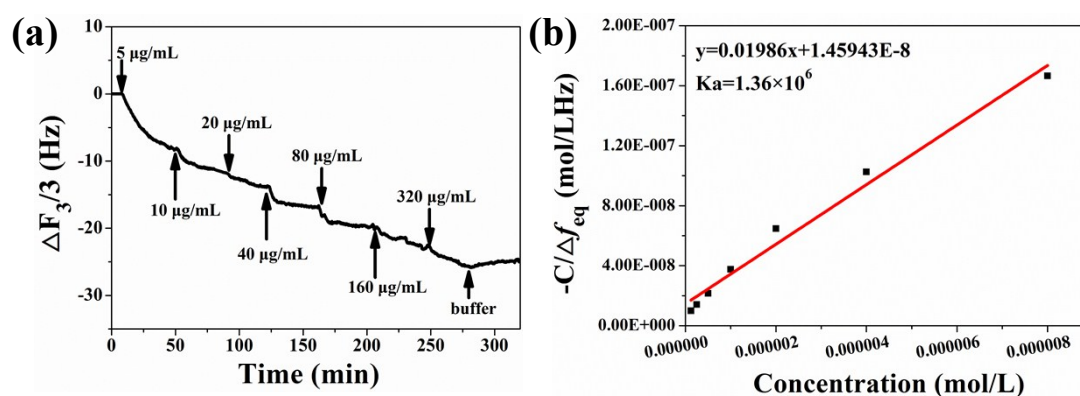

Figure S7. QCM-D experiments. (a) Frequency shift of PM-GG functionalized gold-coated chip for the adsorption of Con A with various concentration; (b) Langmuir isotherm plot of  $C/\Delta f_{\text{eq}}$  vs Concentration.

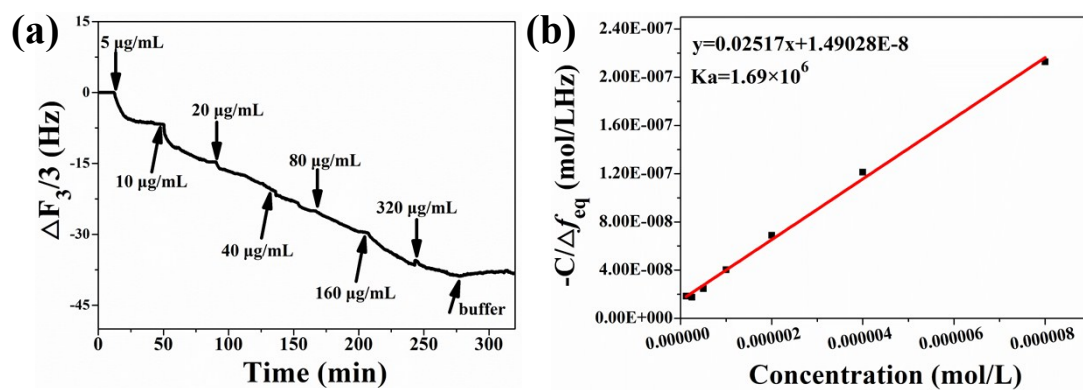

Figure S8. QCM-D experiments. (a) Frequency shift of PM-MM functionalized gold-coated chip for the adsorption of Con A with various concentration; (b) Langmuir isotherm plot of  $C/\Delta f$  vs Concentration.
